# Supplementary material for: Asymmetric relationships between proteins shape genome evolution
Source: Springer Nature journal article supplement (doi:10.1186/gb-2009-10-2-r19), 2009-01-01
Supplement: Additional file 2 [file gb-2009-10-2-r19-s2.pdf]

gluconeogenesis

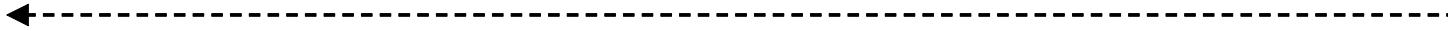

glycolysis

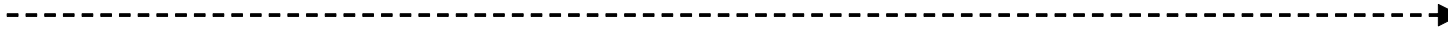

B

Fructose bisphosphatase (fbp)

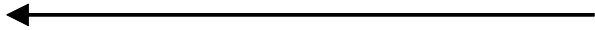

A

Fructose 1,6 bisphosphate aldolase (fba)

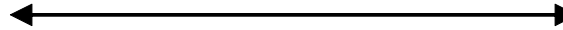

1 phosphofructo kinase

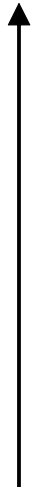

| fbp \ fba | present | absent |
|-----------|---------|--------|
| present   | 138     | 23     |
| absent    | 176     | 36     |
