# Supplementary material for: Asymmetric relationships between proteins shape genome evolution
Source: Springer Nature journal article supplement (doi:10.1186/gb-2009-10-2-r19), 2009-01-01
Supplement: Additional file 4 [file gb-2009-10-2-r19-s4.pdf]

## Additional data file 4, table 1 and 2

**Table 1.** *Saccharomyces cerevisiae* expression datasets.

| GEO series ID             | Number of samples | Reference number as listed in main article |
|---------------------------|-------------------|--------------------------------------------|
| GSE6073                   | 12                | 23                                         |
| GSE1311, GSE1312, GSE1313 | 66                | 24                                         |
| GSE1639                   | 18                | 25                                         |
| GSE1693                   | 26                | 26                                         |
| GSE1934                   | 24                | 27                                         |
| GSE1938                   | 15                | 28                                         |
| GSE1975                   | 28                | 29                                         |
| GSE2343                   | 12                | 30                                         |
| GSE3076                   | 96                | 31                                         |
| GSE3821                   | 16                | 32                                         |
| GSE4135                   | 14                | 33                                         |

**Table 2.** *Escherichia coli* expression datasets.

| GEO series ID    | Number of samples | Reference number as listed in main article |
|------------------|-------------------|--------------------------------------------|
| GSE9814          | 6                 | 34                                         |
| GSE9755          | 4                 | 35                                         |
| GSE9582, GSE9587 | 8                 | 36                                         |
| GSE6925          | 2                 | 37                                         |
| GSE4562          | 7                 | 38                                         |
| GSE6425, GSE6426 | 54                | 39                                         |
| GSE6836          | 266               | 40                                         |
| GSE4556          | 15                | 41                                         |
| GSE4511          | 15                | 42                                         |
| GSE1121          | 43                | 43                                         |
