# Supplementary figures and images for: Asymmetric relationships between proteins shape genome evolution
Source: Springer Nature journal article supplement (doi:10.1186/gb-2009-10-2-r19), 2009-01-01

distance  $\leq$  cutoff □  
 distance  $>$  cutoff ○

0.4 0.5 0.6 0.7 0.8 0.9 1.0

distance cutoff

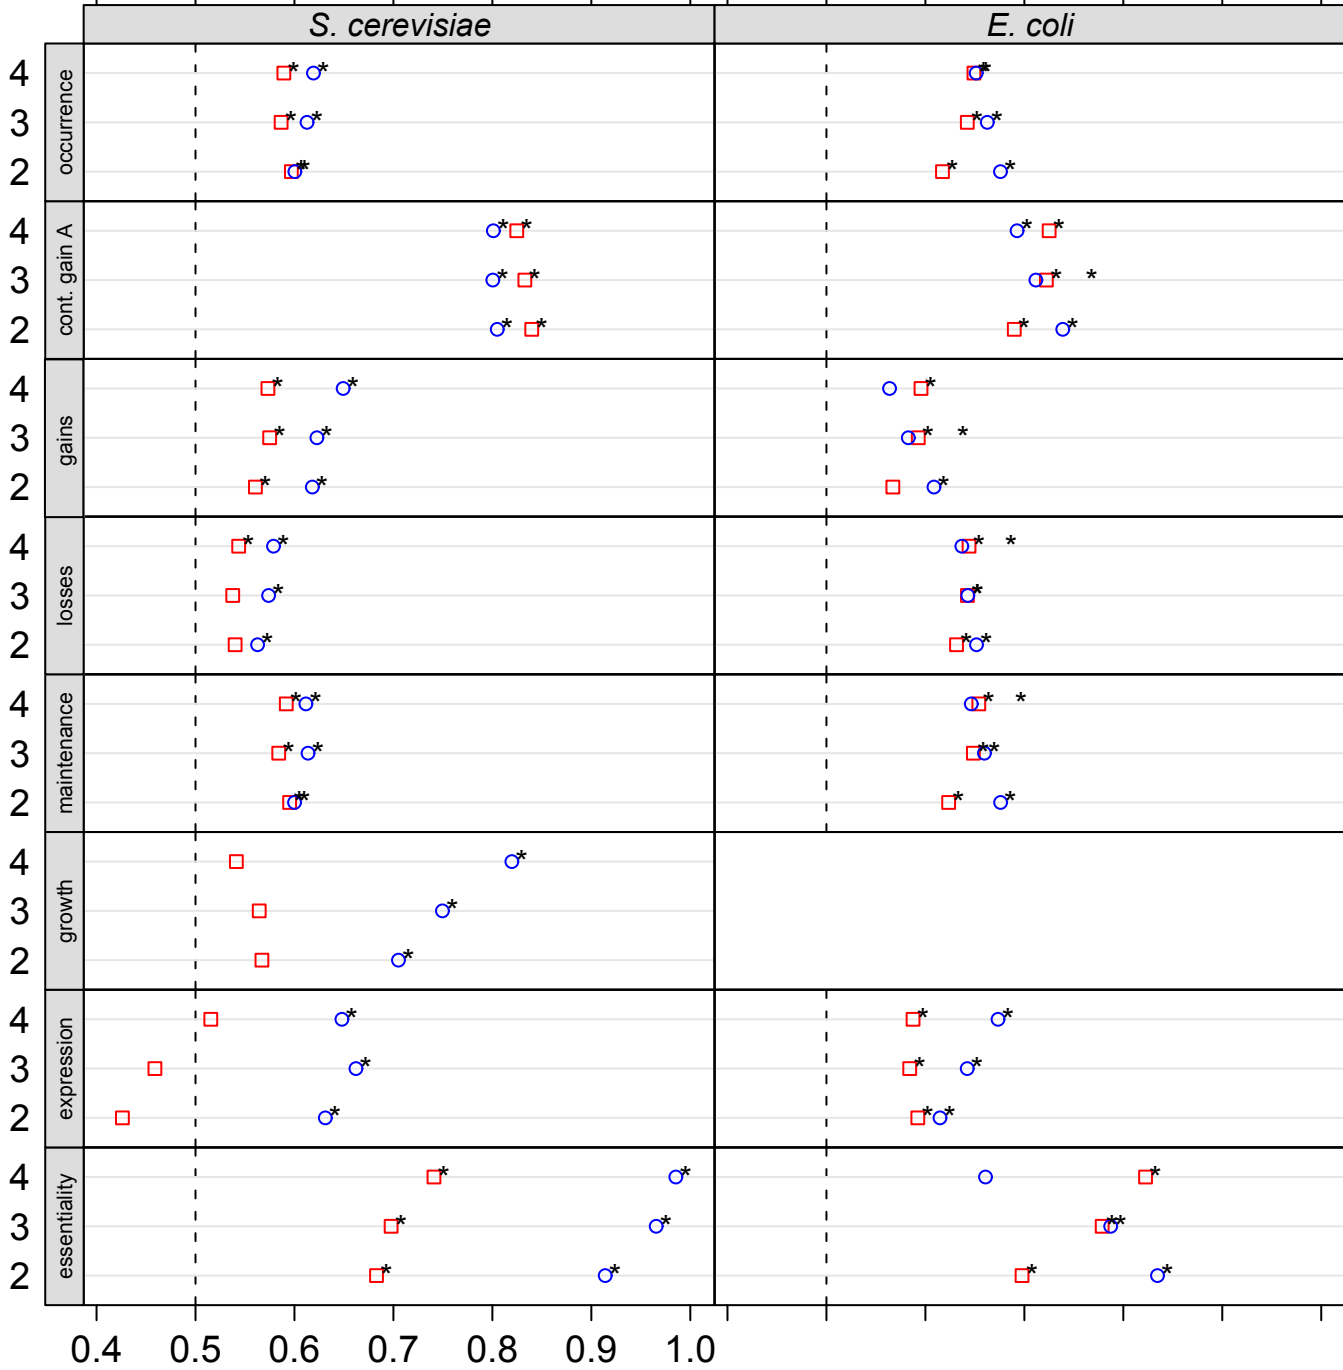

Asymmetry measure (fraction)

Supplement: Additional file 3 [file gb-2009-10-2-r19-s3.pdf]
